# Supplementary material for: Co-designing polysubstance use harm reduction messaging with and for young adults: findings from a participatory, intersectional citizen jury and community survey (The ‘Vibe Check’ Project)
Source: Research Square preprint supplement (doi:10.21203/rs.3.rs-7171854/v1), 2025-08-12
Supplement: Supplementary file 1 [file 0bbd7c5dd7c13c3fc6d8df34.docx]

Supplementary Materials

**Table 1. Demographic characteristics of community survey young adult respondents (n=39)**

| **Variable** |  |
| --- | --- |
| ***Demographic variable*** |  |
| Age – M (SD) | 24.2 (3.4) |
| Sex – *N* (%)  Male  Female | 11 (28.2)  28 (71.8) |
| Gender Identity Description – *N* (%)  Man  Woman  Non-binary  Gender fluid  Trans masculine  Trans man  Trans feminine  Trans woman  Transgender  Genderqueer | 8 (20.5)  24 (61.5)  9 (23.1)  2 (5.1)  2 (5.1)  2 (5.1)  1 (2.6)  1 (2.6)  2 (5.1)  1 (2.6) |
| Gender Identity Category – *N* (%)  Boy (cis or trans)  Girl (cis or trans)  Non-binary  Other | 9 (23.1)  23 (59)  5 (12.8)  2 (5.1) |
| Gender Diversity – *N* (%)  Trans and gender diverse  Cisgender | 7 (17.9)  32 (82.1) |
| Sexuality – *N* (%)  Gay or Lesbian  Bisexual or Bi+  Heterosexual  Queer  Pansexual  Unsure  Prefer not to say | 5 (12.8)  9 (23.1)  17 (43.6)  5 (12.8)  1 (2.6)  1 (2.6)  1 (2.6) |
| Country of Birth – *N* (%)  Australia  Canada  Hong Kong  India  Mexico  United Kingdom  United States | 30 (78.9)  1 (2.6)  1 (5.30)  1 (2.6)  1 (2.6)  1 (5.30)  1 (2.6) |
| Highest level of educational attainment – *N* (%)  Secondary school  Vocational education  Certificate IV/Diploma  Undergraduate degree  Postgraduate degree | 14 (35.9)  3 (7.7)  1 (2.6)  14 (35.9)  7 (17.9) |
| Current employment status – *N* (%)  Full-time  Part-time  Casual  Full-time Student  Unemployed | 17 (43.6)  2 (5.1)  5 (12.8)  10 (25.6)  5 (12.8) |
| Income – *N* (%)  $1 to $7,7999 per year  $7,800 to $15,599 per year  $15,600 to $20,799 per year  $20,800 to $25,999 per year  $26,000 to $33,799 per year  $33,800 to $41,599 per year  $41,600 to $51,999 per year  $52,000 to $64,999 per year  $65,000 to $77,999 per year  $78,000 to $90,999 per year  $91,000 to $103,999 per year  $104,000 to $155,999 per year  $156,000 to $181,999 per year  $182,000 or more per year | 3 (7.7)  2 (5.1)  3 (7.7)  2 (5.1)  1 (2.6)  1 (2.6)  2 (5.1)  3 (7.7)  7 (17.9)  6 (15.4)  5 (12.8)  2 (5.1)  1 (2.6)  1 (2.6) |
| ***Substance use variable*** |  |
| Ever smoked a cigarette – N (%)  Yes  No | 36 (94.7)  2 (5.3) |
| Cigarette smoking frequency – N (%)  Daily  At least weekly (but not daily)  At least monthly (but not weekly)  Less than monthly  I used to use them, no longer use  I only tried them once or twice | 5 (13.9)  4 (11.1)  3 (8.3)  11 (30.6)  4 (11.0)  9 (25.0) |
| Ever used a vape – N (%)  Yes  No | 34 (89.5)  4 (10.5) |
| Vaping use frequency – N (%)  Daily  Less than monthly  I only tried once or twice | 2 (14.3)  3 (21.4)  9 (64.3) |
| Alcohol use disorder threshold – N (%)  Possible alcohol dependence  Harmful use  Hazardous use  Low risk | 3 (7.7)  7 (17.9)  17 (43.6)  12 (30.8) |
| Cannabis use disorder threshold – N (%)  Possible cannabis use disorder  Hazardous use  Low risk | 9 (23.1)  4 (10.3)  26 (66.7) |

Note – N: Count, %: Proportion, M: Mean, SD: Standard Deviation.

**Table 2. Perceived level of concern about potential harms arising from occasions of polysubstance use among young people**

| Harm | *N* (%) |
| --- | --- |
| Injury  Not at all concerned  Slightly concerned  Somewhat concerned  Moderately concerned  Extremely concerned | 8 (22.9)  16 (45.7)  4 (11.4)  4 (11.4)  3 (8.6) |
| Aggression  Not at all concerned  Slightly concerned  Somewhat concerned  Moderately concerned  Extremely concerned | 20 (57.1)  8 (22.9)  2 (5.7)  2 (5.7)  3 (8.6) |
| Hospitalisation  Not at all concerned  Slightly concerned  Somewhat concerned  Moderately concerned  Extremely concerned | 12 (34.3)  15 (42.9)  4 (11.4)  2 (5.7)  2 (5.7) |
| Alcohol poisoning  Not at all concerned  Slightly concerned  Somewhat concerned  Moderately concerned  Extremely concerned | 18 (51.4)  11 (31.4)  3 (8.6)  2 (5.7)  1 (2.9) |
| Drug interactions  Not at all concerned  Slightly concerned  Somewhat concerned  Moderately concerned  Extremely concerned | 1 (2.9)  11 (31.4)  7 (20)  11 (31.4)  5 (14.3) |
| Tolerance  Not at all concerned  Slightly concerned  Somewhat concerned  Moderately concerned  Extremely concerned | 12 (34.3)  8 (22.9)  7 (20)  3 (8.6)  5 (14.3) |
| Dependence  Not at all concerned  Slightly concerned  Somewhat concerned  Moderately concerned  Extremely concerned | 14 (40)  9 (25.7)  6 (17.1)  1 (2.9)  5 (14.3) |
| Annoying others  Not at all concerned  Slightly concerned  Somewhat concerned  Moderately concerned  Extremely concerned | 1 (2.9)  11 (31.4)  7 (20)  11 (31.4)  5 (14.3) |
| Fights with partner  Not at all concerned  Slightly concerned  Somewhat concerned  Moderately concerned  Extremely concerned | 19 (54.3)  10 (28.6)  2 (5.7)  1 (2.9)  3 (8.6) |
| Overspending  Not at all concerned  Slightly concerned  Somewhat concerned  Moderately concerned  Extremely concerned | 4 (11.4)  7 (20)  8 (22.9)  7 (20)  9 (25.7) |
| Gambling  Not at all concerned  Slightly concerned  Somewhat concerned  Moderately concerned  Extremely concerned | 31 (88.6)  1 (2.9)  0  1 (2.9)  2 (5.7) |
| Risky sex  Not at all concerned  Slightly concerned  Somewhat concerned  Moderately concerned  Extremely concerned | 18 (51.4)  8 (22.9)  4 (11.4)  3 (8.6)  2 (5.7) |
| Missed work/school  Not at all concerned  Slightly concerned  Somewhat concerned  Moderately concerned  Extremely concerned | 16 (45.7)  11 (31.4)  3 (8.6)  2 (5.7)  3 (8.6) |
| Unwanted sex  Not at all concerned  Slightly concerned  Somewhat concerned  Moderately concerned  Extremely concerned | 19 (54.3)  10 (28.6)  2 (5.7)  1 (2.9)  3 (8.6) |

**Table 3. Preferred social media or digital app platforms for sharing polysubstance use harm reduction messaging and resources for young adults**

| **Social media platform** | ***N* (%)** |
| --- | --- |
| Instagram  Yes  No | 32 (82.1)  7 (17.9) |
| Facebook  Yes  No | 8 (20.5)  31 (79.5) |
| LinkedIn  Yes  No | 1 (2.6)  38 (97.4) |
| X/Twitter  Yes  No | 6 (15.4)  33 (84.6) |
| Discord  Yes  No | 6 (15.4)  33 (84.6) |
| Snapchat  Yes  No | 7 (17.9)  32 (82.1) |
| Mainstream dating apps  Yes  No | 15 (38.5)  24 (61.5) |
| Gay men dating apps  Yes  No | 12 (30.8)  27 (69.2) |
| Gay women dating apps  Yes  No | 10 (25.6)  29 (74.4) |
| Other  Yes  No | 5 (12.8)  34 (87.2) |
| TikTok  Yes  No | 5 (12.8)  34 (87.2) |

Note: Participants could select multiple responses hence counts summed across rows may exceed total sample size (*N*=39).
