# Supplementary material for: Co-designing polysubstance use harm reduction messaging with and for young adults: findings from a participatory, intersectional citizen jury and community survey (The ‘Vibe Check’ Project)
Source: Research Square preprint supplement (doi:10.21203/rs.3.rs-7171854/v1), 2025-08-12
Supplement: Supplementary file 3 [file 9724e6da6422c9a7864ee0aa.docx]

## Appendix F - Citizen jury agenda

Attendees will be 8 to 10 (max) consented jurors and at least three members of the core Vibe Check research team (SB, ZB, LE, FG). Prior to the jury session, jurors will be sent no later than one week before session an information pack containing key background information relevant to deliberative questions. Jurors will be encouraged to have this information pack easily accessible to refer to throughout the jury session where helpful.

**Table 1. Proposed agenda and timeline of the citizen jury session**

| **Agenda item** | **Presenter** | **Details** | **Maximum estimated duration** |
| --- | --- | --- | --- |
| Greeting and acknowledgement of country | Study team member/s | Study team member/s to welcome jurors and acknowledge country, inviting participants to also share where they are also dialling in from | 5 minutes |
| Introduction of research team members in attendance | Study team members | Study team members in attendance to briefly introduce themselves, including name, pronouns, role, and research interests | 5 minutes |
| Expert presentations | To be confirmed | The study team will consult with the Matilda Centre Youth Advisory Board (YAB) and lived experience researcher (FG) to identify key topics to be discussed and presented for jurors. Though these presenters and topics are yet to be confirmed, it is likely there will be three presentations. Possible presenters may include substance use research experts and renowned harm reduction practitioners from The Matilda Centre, Alcohol and Drug Foundation, DanceWize, and ACON Rovers. | 30 minutes |
| Presentation on findings from Vibe Check survey | Study team members | The Vibe Check survey is the first stage of this research and citizen juries will only be conducted once survey recruitment has closed. | 10 minutes |
| Information about citizen jury methods and rules of engagement | Study team members in attendance | Study team member/s to present brief overview on citizen science methods, particularly citizen juries, and unique strengths and characteristics.  Jurors to be reminded of agreed rules of engagement, including avoiding use of names when sharing own personal experiences (e.g., names of people, places, venues/clubs, schools, workplaces, etc)  Jurors will also be reminded not to share any identifying information with others outside of the jury or to attribute any views shared during the jury to any specific jurors | 10 minutes |
| Deliberation session 1 | All | The study team will consult with the Matilda Centre Youth Advisory Board (YAB) and lived experience researcher (FG) to identify and articulate the precise jury question requiring deliberation. The jury question for the first deliberation session will likely pertain to identifying the key harms arising from polysubstance use among young people in Australia. | 2.5 hours |
| Lunch break | All | Jurors will be encouraged to turn off video and microphone, stand up, and stretch legs, while taking a brief recess. | 30 minutes |
| Deliberation session 2 | All | The study team will consult with the Matilda Centre Youth Advisory Board (YAB) and lived experience researcher (FG) to identify and articulate the precise jury question requiring deliberation. The jury question for the second deliberation session will likely pertain to how to best reduce and minimise harms from polysubstance use among young people in Australia. | 2.5 hours |
| De-brief | All | Overall group de-brief where group shares final recommendations and thoughts. This item will also provide time for members to prepare and finalise written recommendations and reflections on jury questions.  This item will also ask participants how they found the overall experience of participating in the online citizen jury, and also allocate time for participants to complete a brief questionnaire about their citizen jury experience.  Study team members will remind participants of the benefits of their participation, including when and how they will receive reimbursement (Prezzee voucher via email within the following two business days). | 30 minutes |
